# Supplementary material for: Estimating Density and Temperature Dependence of Juvenile Vital Rates Using a Hidden Markov Model
Source: Preprints.org preprint supplement (doi:10.20944/preprints201612.0092.v1), 2016-12-18
Supplement: Supplementary file 1 [file supplementary]

**Table S1** Model selection table showing the information criteria (AICc and  $\Delta$ AICc), model likelihood, and relative likelihood (Weight) for each model.

| <b>model</b>                   |                           | <b># Par</b> | <b>AICc</b> | <b><math>\Delta</math>AICc</b> | <b>Weight</b> |
|--------------------------------|---------------------------|--------------|-------------|--------------------------------|---------------|
| $\phi(\text{st(E,L),date})$    | $\psi(\text{stage})$      | 28           | 1588.86     | 0                              | 0.5           |
| $\phi(\text{stage})$           | $\psi(\text{stage})$      | 29           | 1588.87     | 0.01                           | 0.5           |
| $\phi(\text{st(E,L)})$         | $\psi(\text{stage})$      | 26           | 1603.58     | 14.72                          | 0             |
| $\phi(\text{stage,density})$   | $\psi(\text{stage,temp})$ | 38           | 1605        | 16.14                          | 0             |
| $\phi(\text{st(E,L),density})$ | $\psi(\text{stage,temp})$ | 32           | 1606.37     | 17.51                          | 0             |
| $\phi(\text{st(E,L)})$         | $\psi(\text{stage,temp})$ | 30           | 1607.96     | 19.1                           | 0             |
| $\phi(\text{stage})$           | $\psi(\text{stage,date})$ | 33           | 1608.09     | 19.23                          | 0             |
| $\phi(\text{st(E,L),date})$    | $\psi(\text{stage,temp})$ | 32           | 1612.62     | 23.76                          | 0             |
| $\phi(\text{st(E,L),density})$ | $\psi(\text{stage,date})$ | 32           | 1617.25     | 28.39                          | 0             |
| $\phi(\text{stage,date})$      | $\psi(\text{stage,date})$ | 38           | 1620.53     | 31.67                          | 0             |
| $\phi(\text{stage})$           | $\psi(\text{stage,temp})$ | 33           | 1621.13     | 32.27                          | 0             |
| $\phi(\text{stage,density})$   | $\psi(\text{stage,date})$ | 34           | 1629.24     | 40.38                          | 0             |
| $\phi(\text{st(E,L),date})$    | $\psi(\text{stage,date})$ | 32           | 1630.5      | 41.64                          | 0             |
| $\phi(\text{st(E,L),density})$ | $\psi(\text{stage})$      | 28           | 1633        | 44.14                          | 0             |
| $\phi(\text{stage,date})$      | $\psi(\text{stage,temp})$ | 38           | 1641.69     | 52.83                          | 0             |
| $\phi(\text{stage,density})$   | $\psi(\text{stage})$      | 38           | 1647.73     | 58.87                          | 0             |
| $\phi(\text{st(E,L)})$         | $\psi(\text{stage,date})$ | 30           | 1663.16     | 74.3                           | 0             |
| $\phi(\text{stage,date})$      | $\psi(\text{stage})$      | 34           | 1665.02     | 76.16                          | 0             |

*Note:* Models were manipulated such that either survival ( $\phi$ ) or transition ( $\psi$ ) probabilities were functions of stage, survey date, density, or temperature. For survival only, stage was grouped into early and late instar, represented as, st(E,L). All models used stage-dependent probability of observation.

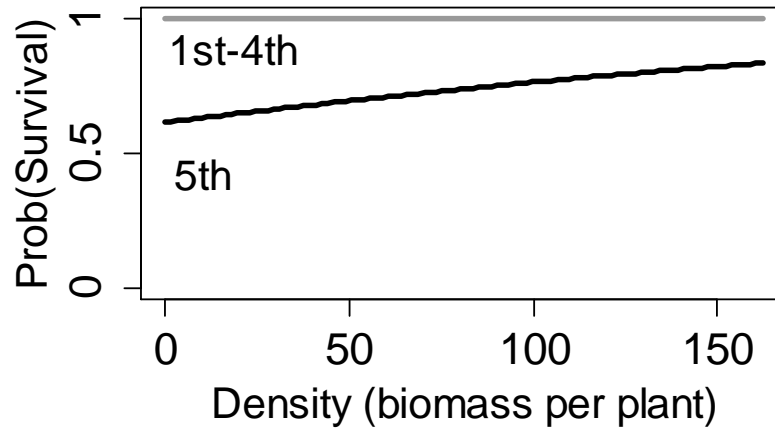

**Figure S2** Change in mean survival of *A. aidea* in response to size-scaled density. Size-scaled density was estimated by the sum of the lengths of all caterpillars on a plant at each survey.

**Online resource 5:** R code and data

See text file with data and R script, “A\_aidea\_HidMark\_Script.txt”
